# Supplementary material for: Density functional study on the mechanism of direct N-acylation reaction of lactams with aldehydes catalyzed by Shvo's catalyst
Source: Royal Society of Chemistry journal article supplement (doi:10.1039/c5qo00082c), 2015-01-01
Supplement: c5qo00082c1.pdf [file c5qo00082c1.pdf]

# Supporting Material for Density Functional Study on the Mechanism of Direct N-Acylation Reaction of Lactams with Aldehydes Catalyzed by Shvo's Catalyst

Qian Liu,<sup>a</sup> Xi Lu,<sup>\*b,c</sup> Xiaomin Sun<sup>d</sup> and Xian Zhao<sup>\*a</sup>

<sup>a</sup>State Key Laboratory of Crystal Materials, Shandong University, Jinan 250100, China,

<sup>b</sup>Department of Chemical and Materials Engineering, University of Alberta, Edmonton, AB,

T6G 2V4, Canada, <sup>c</sup>Research Institute of Petroleum Exploration and Development, Sinopec,

Beijing, 100083, People's Republic of China, <sup>d</sup>Environment Research Institute, Shandong

University, Jinan, 250100, People's Republic of China.

E-mail: \*xlu2@ualberta.ca; zhaoxian@sdu.edu.cn

Gaussian 09, Revision B.01,

M. J. Frisch, G. W. Trucks, H. B. Schlegel, G. E. Scuseria, M. A. Robb, J. R. Cheeseman, G. Scalmani, V. Barone, B. Mennucci, G. A. Petersson, H. Nakatsuji, M. Caricato, X. Li, H. P. Hratchian, A. F. Izmaylov, J. Bloino, G. Zheng, J. L. Sonnenberg, M. Hada, M. Ehara, K. Toyota, R. Fukuda, J. Hasegawa, M. Ishida, T. Nakajima, Y. Honda, O. Kitao, H. Nakai, T. Vreven, J. A. Montgomery, Jr., J. E. Peralta, F. Ogliaro, M. Bearpark, J. J. Heyd, E. Brothers, K. N. Kudin, V. N. Staroverov, R. Kobayashi, J. Normand, K. Raghavachari, A. Rendell, J. C. Burant, S. S. Iyengar, J. Tomasi, M. Cossi, N. Rega, J. M. Millam, M. Klene, J. E. Knox, J. B. Cross, V. Bakken, C. Adamo, J. Jaramillo, R. Gomperts, R. E. Stratmann, O. Yazyev, A. J. Austin, R. Cammi, C. Pomelli, J. W. Ochterski, R. L. Martin, K. Morokuma, V. G. Zakrzewski, G. A. Voth, P. Salvador, J. J. Dannenberg, S. Dapprich, A. D. Daniels, O. Farkas, J. B. Foresman, J. V. Ortiz, J. Cioslowski, and D. J. Fox, Gaussian, Inc., Wallingford CT, 2009.

**Table S1 M062X-calculated energies and thermochemistry in gas at 298 K and 1 atm (Hartree)**

| <b>Complexes</b>     | $E_{\text{SCF}}$ | $E_{\text{SCF}} + H_{\text{corr}}$ | $E_{\text{SCF}} + G_{\text{corr}}$ |
|----------------------|------------------|------------------------------------|------------------------------------|
| <b>1</b>             | -286.500808      | -286.381722                        | -286.416817                        |
| <b>TS1</b>           | -286.414519      | -286.301082                        | -286.335954                        |
| <b>2</b>             | -286.479568      | -286.360834                        | -286.395856                        |
| <b>PhCHO</b>         | -345.419894      | -345.301361                        | -345.339075                        |
| <b>TS2</b>           | -631.903939      | -631.666384                        | -631.718695                        |
| <b>3</b>             | -631.946999      | -631.704934                        | -631.757016                        |
| <b>4</b>             | -1512.240490     | -1511.788426                       | -1511.882171                       |
| <b>TS3</b>           | -2144.185534     | -2143.498932                       | -2143.617638                       |
| <b>5</b>             | -630.7582126     | -630.540792                        | -630.591243                        |
| <b>6</b>             | -1513.449380     | -1512.976658                       | -1513.070476                       |
| <b>7</b>             | -1798.791295     | -1798.217900                       | -1798.323229                       |
| <b>TS4</b>           | -1798.695688     | -1798.127685                       | -1798.233252                       |
| <b>8</b>             | -1798.753763     | -1798.181019                       | -1798.287724                       |
| <b>TS5</b>           | -2144.179274     | -2143.487104                       | -2143.608801                       |
| <b>9</b>             | -2144.230132     | -2143.533682                       | -2143.654502                       |
| <b>TS6</b>           | -573.000063      | -572.768320                        | -572.819080                        |
| <b>10</b>            | -573.012580      | -572.772846                        | -572.825431                        |
| <b>10'</b>           | -631.9378896     | -631.698085                        | -631.752527                        |
| <b>TS7</b>           | -918.422247      | -918.062672                        | -918.133533                        |
| <b>TS8</b>           | -918.429959      | -918.069717                        | -918.139729                        |
| <b>TS9</b>           | -918.425010      | -918.065232                        | -918.134572                        |
| <b>11</b>            | -918.476214      | -918.112993                        | -918.184204                        |
| <b>H<sub>2</sub></b> | -1.167486        | -1.153850                          | -1.168629                          |

**Table S2 Single-point energies<sup>a</sup> obtained at the M062X/def2-TZVP, 6-31++G\*\* level with SMD solvent model in toluene (Hartree)**

| <b>Complexes</b> | $E(\text{sol}) + \Delta G(\text{sol})$ |
|------------------|----------------------------------------|
| <b>1</b>         | -286.531796                            |

|                      |              |
|----------------------|--------------|
| <b>TS1</b>           | -286.445957  |
| <b>2</b>             | -286.510108  |
| <b>PhCHO</b>         | -345.449862  |
| <b>TS2</b>           | -631.961010  |
| <b>3</b>             | -632.003977  |
| <b>4</b>             | -1513.389860 |
| <b>TS3</b>           | -2145.385972 |
| <b>5</b>             | -630.8072323 |
| <b>6</b>             | -1514.611378 |
| <b>7</b>             | -1799.960515 |
| <b>TS4</b>           | -1799.866511 |
| <b>8</b>             | -1799.924748 |
| <b>TS5</b>           | -2145.375205 |
| <b>9</b>             | -2145.426158 |
| <b>TS6</b>           | -2145.426158 |
| <b>10</b>            | -573.065581  |
| <b>10'</b>           | -631.991978  |
| <b>TS7</b>           | -918.501868  |
| <b>TS8</b>           | -918.506047  |
| <b>TS9</b>           | -918.504013  |
| <b>11</b>            | -918.556727  |
| <b>H<sub>2</sub></b> | -1.167004    |

---

a. Single-point calculations were performed based on the gas-optimized structures

---

## Cartesian Coordinates of M062X-Optimized Structures in Gas

### 1

|   |             |             |             |
|---|-------------|-------------|-------------|
| C | -0.00907600 | 1.21801200  | 0.15021500  |
| C | -1.40293900 | 0.69065200  | -0.20398100 |
| C | -1.32294100 | -0.80913900 | 0.14159300  |
| H | 0.05323500  | 1.54246000  | 1.19547000  |
| H | 0.33980500  | 2.04080100  | -0.47545000 |
| H | -2.21192900 | 1.19332100  | 0.32905900  |
| H | -1.57980400 | 0.80249700  | -1.27756900 |
| H | -1.61445300 | -0.99530700 | 1.18465300  |
| H | -1.95855600 | -1.42025200 | -0.50477400 |
| C | 0.90243400  | 0.00139600  | -0.00778800 |
| O | 2.11323400  | -0.01185900 | -0.04458900 |
| N | 0.08273500  | -1.09346000 | -0.07855500 |
| H | 0.48181600  | -2.01995100 | -0.02502800 |

### TS1

|   |             |             |             |
|---|-------------|-------------|-------------|
| C | 0.19062300  | 1.26879100  | 0.12833100  |
| C | 1.50830400  | 0.51482700  | -0.17197500 |
| C | 1.19114200  | -0.98202900 | 0.11260800  |
| H | -0.01820900 | 2.09608500  | -0.55226600 |
| H | 0.14707800  | 1.65690700  | 1.15180800  |
| H | 1.75634500  | 0.63272000  | -1.23056300 |
| H | 2.35507900  | 0.88113200  | 0.41255400  |
| H | 1.69597000  | -1.65110000 | -0.58865700 |
| H | 1.48255500  | -1.27534100 | 1.12866300  |
| C | -0.79925400 | 0.14849300  | -0.00423400 |
| O | -2.07361300 | 0.05121900  | -0.04512800 |
| N | -0.25776300 | -1.03412300 | -0.04100700 |
| H | -1.57046100 | -1.21178700 | -0.06184700 |

### 2

|   |             |             |             |
|---|-------------|-------------|-------------|
| C | -0.08868900 | 1.20527300  | 0.13348300  |
| C | -1.48223600 | 0.63409700  | -0.16718300 |
| C | -1.29810300 | -0.88257100 | 0.09297500  |

|   |             |             |             |
|---|-------------|-------------|-------------|
| H | 0.00443600  | 1.59452100  | 1.15424500  |
| H | 0.24077700  | 1.99055400  | -0.55104000 |
| H | -2.27468700 | 1.07877200  | 0.43830700  |
| H | -1.72995100 | 0.80119100  | -1.21950400 |
| H | -1.62616000 | -1.16344800 | 1.10170800  |
| H | -1.86218400 | -1.49999200 | -0.61174600 |
| C | 0.74191600  | -0.04533900 | 0.00131200  |
| O | 2.07727500  | 0.08291700  | -0.04659800 |
| N | 0.13617000  | -1.15933000 | -0.02993000 |
| H | 2.43905300  | -0.81837600 | -0.09320300 |

### PhCHO

|   |             |             |             |
|---|-------------|-------------|-------------|
| C | -1.98979800 | 0.47059500  | -0.00000400 |
| O | -2.83005100 | -0.39748400 | -0.00001000 |
| H | -2.27908500 | 1.54272500  | 0.00000700  |
| C | -0.52872700 | 0.21674700  | 0.00000000  |
| C | -0.05017500 | -1.09610300 | -0.00000500 |
| C | 0.36100200  | 1.29039100  | 0.00000700  |
| C | 1.31819700  | -1.32904300 | -0.00000200 |
| H | -0.76854000 | -1.91051400 | -0.00001100 |
| C | 1.73275700  | 1.05622300  | 0.00000900  |
| H | -0.02468400 | 2.30766400  | 0.00001000  |
| C | 2.20813000  | -0.25298800 | 0.00000500  |
| H | 1.69776100  | -2.34599100 | -0.00000500 |
| H | 2.42851700  | 1.88917200  | 0.00001400  |
| H | 3.27812500  | -0.43811600 | 0.00000700  |

### TS2

|   |             |             |             |
|---|-------------|-------------|-------------|
| C | 0.03798900  | 1.23653200  | -0.84654800 |
| O | -0.37497500 | 2.26887700  | -0.24704700 |
| H | -0.12354400 | 1.13034200  | -1.93406300 |
| C | 1.29244800  | 0.55770000  | -0.37107000 |
| C | 1.77600700  | 0.84064100  | 0.90476900  |
| C | 1.95815000  | -0.35870900 | -1.18234100 |
| C | 2.91924400  | 0.20007100  | 1.37011800  |
| H | 1.24366700  | 1.57347400  | 1.50350500  |

|   |              |              |              |
|---|--------------|--------------|--------------|
| C | 3. 10386900  | -0. 99968700 | -0. 71817600 |
| H | 1. 57758500  | -0. 56557900 | -2. 18117500 |
| C | 3. 58256200  | -0. 72153800 | 0. 56015500  |
| H | 3. 29975500  | 0. 42026900  | 2. 36316700  |
| H | 3. 62570800  | -1. 70979700 | -1. 35263300 |
| H | 4. 47719600  | -1. 21847400 | 0. 92354600  |
| C | -3. 14319200 | -0. 82807700 | 0. 70969700  |
| C | -2. 43874500 | -2. 07484300 | 0. 15309800  |
| C | -1. 02985600 | -1. 55964100 | -0. 22111800 |
| H | -3. 06981500 | -0. 74603700 | 1. 80047700  |
| H | -4. 19770500 | -0. 73890200 | 0. 44031800  |
| H | -2. 40505400 | -2. 90388200 | 0. 86176700  |
| H | -2. 95401900 | -2. 41892700 | -0. 74777400 |
| H | -0. 29836900 | -1. 71397300 | 0. 58184900  |
| H | -0. 63110400 | -2. 02995700 | -1. 12421800 |
| C | -2. 31965500 | 0. 27602800  | 0. 09862100  |
| O | -2. 70208200 | 1. 52018500  | 0. 15217300  |
| N | -1. 21401700 | -0. 12593700 | -0. 43330600 |
| H | -1. 86264100 | 2. 07963500  | -0. 08586800 |

### 3

|   |              |              |              |
|---|--------------|--------------|--------------|
| C | 0. 16995500  | 0. 98363200  | 0. 39612700  |
| O | 0. 37603900  | 2. 03862400  | -0. 50375600 |
| H | 0. 32181500  | 1. 33423900  | 1. 42499400  |
| C | -1. 22943900 | 0. 43759400  | 0. 24053500  |
| C | -2. 04441900 | 0. 84467400  | -0. 81171200 |
| C | -1. 69939100 | -0. 50724300 | 1. 15512800  |
| C | -3. 32317300 | 0. 30657700  | -0. 94905500 |
| H | -1. 67203100 | 1. 58613700  | -1. 50971100 |
| C | -2. 97387800 | -1. 04465600 | 1. 01569000  |
| H | -1. 05744200 | -0. 82196100 | 1. 97537900  |
| C | -3. 78907200 | -0. 63778900 | -0. 04003300 |
| H | -3. 95628400 | 0. 62795300  | -1. 77056900 |
| H | -3. 33448700 | -1. 77701600 | 1. 73156700  |
| H | -4. 78515400 | -1. 05563800 | -0. 14956700 |
| C | 3. 33818200  | -0. 81351800 | -0. 25348400 |

|   |             |              |              |
|---|-------------|--------------|--------------|
| C | 2. 34053800 | -1. 93274200 | -0. 57017600 |
| C | 1. 00289200 | -1. 19150700 | -0. 73144900 |
| H | 3. 79737200 | -0. 40132100 | -1. 15949700 |
| H | 4. 14428800 | -1. 09197500 | 0. 42780800  |
| H | 2. 60155700 | -2. 51011500 | -1. 45867800 |
| H | 2. 26977300 | -2. 62157300 | 0. 27643600  |
| H | 0. 85826600 | -0. 82176800 | -1. 75619200 |
| H | 0. 14001300 | -1. 80400200 | -0. 46286200 |
| C | 2. 47202700 | 0. 28409800  | 0. 34499800  |
| O | 2. 84224300 | 1. 34676500  | 0. 81755500  |
| N | 1. 15874600 | -0. 07551000 | 0. 19836000  |
| H | 1. 22950800 | 2. 42778200  | -0. 24742500 |

#### 4

|    |              |              |              |
|----|--------------|--------------|--------------|
| C  | -1. 19985800 | -0. 90442200 | -0. 61359700 |
| C  | -0. 72851400 | 0. 42343400  | -0. 49228600 |
| C  | 0. 73977100  | 0. 39941600  | -0. 50628600 |
| C  | 1. 17676600  | -0. 93669500 | -0. 65057300 |
| C  | -0. 02947000 | -1. 79862300 | -0. 85581300 |
| C  | 1. 40130600  | -0. 20980800 | 2. 51737600  |
| O  | 2. 25209900  | 0. 17789800  | 3. 17592400  |
| O  | -0. 05908500 | -3. 01461900 | -0. 97554700 |
| C  | -1. 35925800 | -0. 31749600 | 2. 58077800  |
| O  | -2. 19976100 | -0. 03438900 | 3. 30335000  |
| Ru | 0. 00604700  | -0. 69073100 | 1. 28620700  |
| C  | 2. 55959800  | -1. 45367700 | -0. 70508800 |
| C  | 3. 60418500  | -0. 84683000 | 0. 00870600  |
| C  | 2. 84564000  | -2. 57970700 | -1. 48855700 |
| C  | 4. 89772800  | -1. 34672400 | -0. 06586800 |
| H  | 3. 40315400  | 0. 02376400  | 0. 62556900  |
| C  | 4. 14365600  | -3. 07781600 | -1. 55792200 |
| H  | 2. 04340400  | -3. 07043100 | -2. 02636800 |
| C  | 5. 17327700  | -2. 46542600 | -0. 85048900 |
| H  | 5. 69161300  | -0. 86363800 | 0. 49518400  |
| H  | 4. 34822500  | -3. 95246000 | -2. 16764400 |
| H  | 6. 18369300  | -2. 85857200 | -0. 90513200 |

|   |              |              |              |
|---|--------------|--------------|--------------|
| C | 1. 58861500  | 1. 61453600  | -0. 48688100 |
| C | 2. 53780500  | 1. 79940900  | -1. 49734800 |
| C | 1. 43227000  | 2. 59683700  | 0. 49568400  |
| C | 3. 32015800  | 2. 94996000  | -1. 52169400 |
| H | 2. 66586900  | 1. 03154700  | -2. 25516600 |
| C | 2. 21788500  | 3. 74405800  | 0. 47038600  |
| H | 0. 68952200  | 2. 45364800  | 1. 27616200  |
| C | 3. 16340600  | 3. 92292300  | -0. 53721500 |
| H | 4. 05681300  | 3. 08278800  | -2. 30753800 |
| H | 2. 09171300  | 4. 49877800  | 1. 23991700  |
| H | 3. 77808800  | 4. 81734800  | -0. 55357900 |
| C | -1. 55087100 | 1. 65765600  | -0. 50022000 |
| C | -1. 23354100 | 2. 69968100  | -1. 37813000 |
| C | -2. 68709000 | 1. 77444500  | 0. 30787100  |
| C | -2. 03169600 | 3. 83924400  | -1. 43684900 |
| H | -0. 35908800 | 2. 61822700  | -2. 01670300 |
| C | -3. 47874400 | 2. 91484600  | 0. 25214300  |
| H | -2. 96128600 | 0. 96002500  | 0. 97012200  |
| C | -3. 15161500 | 3. 95237000  | -0. 61890300 |
| H | -1. 77315100 | 4. 63971300  | -2. 12271500 |
| H | -4. 35407100 | 2. 99052600  | 0. 88923400  |
| H | -3. 76957800 | 4. 84379400  | -0. 66036800 |
| C | -2. 58892800 | -1. 38739000 | -0. 74448600 |
| C | -2. 97538100 | -2. 56460500 | -0. 09363600 |
| C | -3. 52044200 | -0. 71804200 | -1. 54628300 |
| C | -4. 27438800 | -3. 04543100 | -0. 21872500 |
| H | -2. 24565600 | -3. 10424300 | 0. 50253700  |
| C | -4. 81896900 | -1. 20136800 | -1. 66961700 |
| H | -3. 22446000 | 0. 18362500  | -2. 07434500 |
| C | -5. 20129600 | -2. 36270300 | -1. 00255400 |
| H | -4. 56160300 | -3. 95691100 | 0. 29616900  |
| H | -5. 53211600 | -0. 67053000 | -2. 29271100 |
| H | -6. 21524600 | -2. 73826300 | -1. 09908800 |

### TS3

|   |             |              |              |
|---|-------------|--------------|--------------|
| H | 1. 67177900 | -0. 07933000 | -0. 51229100 |
|---|-------------|--------------|--------------|

|    |             |             |             |
|----|-------------|-------------|-------------|
| C  | -1.02869500 | 1.20015100  | 1.00280700  |
| C  | -2.05512700 | 0.45396800  | 0.30263000  |
| C  | -1.77975200 | -0.94926900 | 0.47928500  |
| C  | -0.58434600 | -1.08647500 | 1.25786800  |
| C  | -0.15984500 | 0.25439500  | 1.62713600  |
| C  | 0.00858800  | -1.32528800 | -2.07822100 |
| O  | -0.05756900 | -2.11030800 | -2.90238600 |
| O  | 0.89416000  | 0.56681400  | 2.34470100  |
| H  | 1.74163600  | 0.00835400  | 2.00972400  |
| C  | 0.08593300  | 1.42026800  | -1.93993900 |
| O  | 0.14791400  | 2.31998200  | -2.64458400 |
| Ru | -0.06905100 | 0.00074700  | -0.69011500 |
| C  | 0.05723100  | -2.32311000 | 1.75132200  |
| C  | 0.21772800  | -3.44743700 | 0.93494100  |
| C  | 0.48854100  | -2.38009200 | 3.08191200  |
| C  | 0.78859600  | -4.60736100 | 1.44264400  |
| H  | -0.08802100 | -3.40725600 | -0.10541900 |
| C  | 1.06241000  | -3.54273100 | 3.58620000  |
| H  | 0.37695300  | -1.50658000 | 3.71682300  |
| C  | 1.21189500  | -4.65949700 | 2.76904600  |
| H  | 0.91448700  | -5.46804500 | 0.79341600  |
| H  | 1.39357100  | -3.57338500 | 4.61962900  |
| H  | 1.66138400  | -5.56635400 | 3.16225700  |
| C  | -2.63810100 | -2.05847500 | -0.00316300 |
| C  | -3.01350500 | -3.07065600 | 0.88588800  |
| C  | -3.12787000 | -2.08609400 | -1.31312600 |
| C  | -3.85766300 | -4.09537700 | 0.46831800  |
| H  | -2.63795000 | -3.05284800 | 1.90466700  |
| C  | -3.97054400 | -3.11062900 | -1.72790600 |
| H  | -2.84860300 | -1.29333300 | -2.00258900 |
| C  | -4.33623600 | -4.11938600 | -0.83877400 |
| H  | -4.13949700 | -4.87670600 | 1.16715100  |
| H  | -4.33961400 | -3.12218000 | -2.74850500 |
| H  | -4.99087300 | -4.92161700 | -1.16466100 |
| C  | -3.28239000 | 1.03857900  | -0.28902300 |
| C  | -4.53477100 | 0.51256900  | 0.04755400  |

|   |              |              |              |
|---|--------------|--------------|--------------|
| C | -3. 22326700 | 2. 15650900  | -1. 12912700 |
| C | -5. 69957800 | 1. 08029400  | -0. 46039800 |
| H | -4. 59338300 | -0. 34654600 | 0. 70924300  |
| C | -4. 38768800 | 2. 72344700  | -1. 63411800 |
| H | -2. 25878200 | 2. 58814200  | -1. 38048200 |
| C | -5. 62957000 | 2. 18435800  | -1. 30498000 |
| H | -6. 66289500 | 0. 65776900  | -0. 19222000 |
| H | -4. 32405100 | 3. 58845300  | -2. 28669000 |
| H | -6. 53834400 | 2. 62506400  | -1. 70285500 |
| C | -0. 98106900 | 2. 66704900  | 1. 20449400  |
| C | 0. 15388900  | 3. 41013600  | 0. 86996800  |
| C | -2. 08596700 | 3. 32158900  | 1. 75918200  |
| C | 0. 18474600  | 4. 78353400  | 1. 09116900  |
| H | 1. 01088600  | 2. 90924300  | 0. 42815500  |
| C | -2. 05599200 | 4. 69571300  | 1. 97279800  |
| H | -2. 97189300 | 2. 74752000  | 2. 01647600  |
| C | -0. 91968500 | 5. 42989200  | 1. 64042900  |
| H | 1. 07593700  | 5. 34410600  | 0. 82583500  |
| H | -2. 92107600 | 5. 19239300  | 2. 40111400  |
| H | -0. 89711100 | 6. 50251500  | 1. 80712100  |
| C | 2. 87962200  | -0. 05464200 | 0. 11801600  |
| O | 2. 79415100  | -0. 57538000 | 1. 28190400  |
| C | 3. 17383300  | 1. 43261700  | 0. 01418300  |
| C | 3. 45379300  | 2. 14760200  | 1. 17476700  |
| C | 3. 15667700  | 2. 08579300  | -1. 22037600 |
| C | 3. 70128300  | 3. 51883600  | 1. 10224100  |
| H | 3. 46426800  | 1. 62427600  | 2. 12469800  |
| C | 3. 39724800  | 3. 45160900  | -1. 29228900 |
| H | 2. 93881100  | 1. 51221900  | -2. 11945800 |
| C | 3. 67011500  | 4. 17137700  | -0. 12603300 |
| H | 3. 91054800  | 4. 07639100  | 2. 00988200  |
| H | 3. 36892600  | 3. 95779400  | -2. 25228100 |
| H | 3. 85755500  | 5. 23973300  | -0. 18020600 |
| C | 4. 53119900  | -2. 81016800 | -1. 71933800 |
| C | 5. 53969600  | -1. 67946800 | -1. 92155100 |
| C | 5. 09147200  | -0. 62704800 | -0. 90023500 |

|   |             |              |              |
|---|-------------|--------------|--------------|
| H | 4. 85131100 | -3. 50257200 | -0. 93143200 |
| H | 4. 30302800 | -3. 39703700 | -2. 61035500 |
| H | 6. 57681600 | -1. 98325900 | -1. 76826200 |
| H | 5. 44643500 | -1. 26793200 | -2. 93092500 |
| H | 5. 51807800 | -0. 81392600 | 0. 09487700  |
| H | 5. 34255100 | 0. 39279500  | -1. 19939400 |
| C | 3. 28423300 | -2. 10579400 | -1. 20233500 |
| O | 2. 17718800 | -2. 59191600 | -1. 10533000 |
| N | 3. 63660800 | -0. 81456800 | -0. 86223600 |

## 5

|   |              |              |              |
|---|--------------|--------------|--------------|
| C | -0. 14309800 | 1. 07726100  | 0. 04041200  |
| O | -0. 23247500 | 2. 28861700  | 0. 01766500  |
| C | 1. 17948600  | 0. 38960000  | 0. 05378000  |
| C | 1. 40226300  | -0. 81402000 | 0. 72399000  |
| C | 2. 24717500  | 1. 06534200  | -0. 54092100 |
| C | 2. 68534800  | -1. 34482800 | 0. 78222900  |
| H | 0. 57774000  | -1. 33013900 | 1. 20264600  |
| C | 3. 52507100  | 0. 52196200  | -0. 49933200 |
| H | 2. 05674300  | 2. 01630800  | -1. 02774800 |
| C | 3. 74441800  | -0. 68368400 | 0. 16359500  |
| H | 2. 85900500  | -2. 27826900 | 1. 30785300  |
| H | 4. 35043800  | 1. 04061900  | -0. 97659400 |
| H | 4. 74368100  | -1. 10689400 | 0. 20376800  |
| C | -3. 08610900 | -1. 13876900 | -0. 43500800 |
| C | -3. 60077200 | -0. 07282300 | 0. 53065200  |
| C | -2. 57135500 | 1. 05039400  | 0. 37963100  |
| H | -3. 44409800 | -0. 96617100 | -1. 45721300 |
| H | -3. 32523700 | -2. 16953600 | -0. 16893800 |
| H | -4. 61404600 | 0. 26542800  | 0. 30761600  |
| H | -3. 58434300 | -0. 45371600 | 1. 55610900  |
| H | -2. 79848200 | 1. 71008200  | -0. 46559600 |
| H | -2. 45726500 | 1. 67270600  | 1. 26849900  |
| C | -1. 57615100 | -0. 93958000 | -0. 45167900 |
| O | -0. 75904700 | -1. 70155900 | -0. 90332000 |
| N | -1. 32423200 | 0. 31971200  | 0. 12153400  |

## 6

|   |              |              |              |
|---|--------------|--------------|--------------|
| H | 0. 16662600  | -2. 07845000 | 2. 06568500  |
| C | -1. 16305800 | -0. 86442500 | -0. 62179300 |

|    |             |             |             |
|----|-------------|-------------|-------------|
| C  | -0.68502900 | 0.50847900  | -0.53930000 |
| C  | 0.73440300  | 0.47927700  | -0.50884700 |
| C  | 1.16495000  | -0.90538700 | -0.59187100 |
| C  | -0.01563500 | -1.69297400 | -0.73032600 |
| C  | 1.23433200  | -0.08496300 | 2.67659700  |
| O  | 2.02175000  | 0.26195800  | 3.43295100  |
| O  | -0.08337700 | -3.02565100 | -0.93511200 |
| H  | 0.79187200  | -3.40630700 | -0.75307600 |
| C  | -1.43817500 | -0.48401800 | 2.60733600  |
| O  | -2.33103800 | -0.40889400 | 3.32073700  |
| Ru | -0.01456100 | -0.65123900 | 1.39010000  |
| C  | 2.53644800  | -1.44238600 | -0.73754500 |
| C  | 3.57429700  | -1.09514000 | 0.13609700  |
| C  | 2.81267500  | -2.31979300 | -1.79486600 |
| C  | 4.85012400  | -1.61517000 | -0.04207200 |
| H  | 3.37363200  | -0.41563500 | 0.95963400  |
| C  | 4.08968400  | -2.85245000 | -1.96269800 |
| H  | 2.02401300  | -2.56758600 | -2.50161300 |
| C  | 5.11113600  | -2.50156200 | -1.08717800 |
| H  | 5.64307100  | -1.33587200 | 0.64459900  |
| H  | 4.28412400  | -3.53425500 | -2.78481500 |
| H  | 6.10655900  | -2.91440900 | -1.21601000 |
| C  | 1.64300600  | 1.64943800  | -0.45447400 |
| C  | 2.69381100  | 1.75563300  | -1.37153800 |
| C  | 1.45640700  | 2.67133300  | 0.48396200  |
| C  | 3.54376100  | 2.85842800  | -1.34673700 |
| H  | 2.84310000  | 0.96864300  | -2.10541700 |
| C  | 2.30285100  | 3.77337700  | 0.50445300  |
| H  | 0.63920200  | 2.59225100  | 1.19681400  |
| C  | 3.35120500  | 3.86904100  | -0.40927700 |
| H  | 4.35671800  | 2.92626500  | -2.06293400 |
| H  | 2.14779600  | 4.55607700  | 1.24025700  |
| H  | 4.01502300  | 4.72760800  | -0.38876300 |
| C  | -1.54023600 | 1.71818100  | -0.57540300 |
| C  | -1.22909300 | 2.76796200  | -1.44689300 |
| C  | -2.69331900 | 1.81724200  | 0.21229100  |

|   |             |             |             |
|---|-------------|-------------|-------------|
| C | -2.04410900 | 3.89467400  | -1.51753100 |
| H | -0.34095800 | 2.69858300  | -2.06851700 |
| C | -3.50992300 | 2.93921900  | 0.13596400  |
| H | -2.95369700 | 1.00415400  | 0.88412300  |
| C | -3.18614500 | 3.98426800  | -0.72712200 |
| H | -1.78535200 | 4.70186300  | -2.19580200 |
| H | -4.39918600 | 2.99738700  | 0.75568800  |
| H | -3.82130900 | 4.86282700  | -0.78228100 |
| C | -2.55614000 | -1.33652400 | -0.79502100 |
| C | -3.02465400 | -2.43906800 | -0.07228700 |
| C | -3.41137300 | -0.70943100 | -1.70678700 |
| C | -4.32396200 | -2.90007200 | -0.25212100 |
| H | -2.35886100 | -2.92765100 | 0.63427100  |
| C | -4.71411700 | -1.16770200 | -1.87931300 |
| H | -3.05397900 | 0.14268500  | -2.27760800 |
| C | -5.17437700 | -2.26242800 | -1.15264700 |
| H | -4.67434200 | -3.75490200 | 0.31805900  |
| H | -5.36935100 | -0.66823900 | -2.58630100 |
| H | -6.19113600 | -2.61819600 | -1.28730400 |

## 7

|    |             |             |             |
|----|-------------|-------------|-------------|
| C  | -1.16776500 | -0.94896800 | -0.82988200 |
| C  | -1.41784800 | 0.41638400  | -0.45464900 |
| C  | -0.15746600 | 1.13108900  | -0.50234300 |
| C  | 0.86490800  | 0.21415500  | -0.91974900 |
| C  | 0.21046000  | -1.04690000 | -1.34753500 |
| C  | 0.90519100  | 0.67131600  | 2.31167400  |
| O  | 1.44641900  | 1.40393800  | 3.00806100  |
| O  | 0.74692800  | -2.03457000 | -1.86041200 |
| C  | -1.31603800 | -0.94140700 | 2.39219400  |
| O  | -2.10178400 | -1.25047600 | 3.16121800  |
| Ru | -0.03849500 | -0.41058100 | 1.04910800  |
| C  | 2.28033500  | 0.51860300  | -1.21780200 |
| C  | 3.09374100  | 1.25011000  | -0.34193700 |
| C  | 2.82757000  | 0.08309200  | -2.43313900 |
| C  | 4.41043100  | 1.55210800  | -0.67731700 |

|   |              |              |              |
|---|--------------|--------------|--------------|
| H | 2. 68480900  | 1. 60230700  | 0. 60135400  |
| C | 4. 14464500  | 0. 38969200  | -2. 76829500 |
| H | 2. 21118500  | -0. 50157200 | -3. 10752800 |
| C | 4. 94116700  | 1. 12577000  | -1. 89409000 |
| H | 5. 02083400  | 2. 12757700  | 0. 01216600  |
| H | 4. 54802900  | 0. 04923600  | -3. 71726900 |
| H | 5. 96728800  | 1. 36456300  | -2. 15605800 |
| C | 0. 01601900  | 2. 59001700  | -0. 29067600 |
| C | 0. 69606300  | 3. 34326700  | -1. 25279900 |
| C | -0. 52515500 | 3. 23945500  | 0. 82391100  |
| C | 0. 83504100  | 4. 72012700  | -1. 10027700 |
| H | 1. 11901700  | 2. 84441600  | -2. 12019500 |
| C | -0. 38574100 | 4. 61404200  | 0. 97386300  |
| H | -1. 05973400 | 2. 65648200  | 1. 56954200  |
| C | 0. 29656400  | 5. 35845000  | 0. 01318100  |
| H | 1. 36745100  | 5. 29193300  | -1. 85383600 |
| H | -0. 80899000 | 5. 10423200  | 1. 84490600  |
| H | 0. 40885800  | 6. 43144000  | 0. 13416500  |
| C | -2. 74650000 | 1. 04807000  | -0. 25248600 |
| C | -3. 05983300 | 2. 22053500  | -0. 94905700 |
| C | -3. 72439100 | 0. 46494300  | 0. 56027800  |
| C | -4. 31568900 | 2. 80698000  | -0. 81933000 |
| H | -2. 31454300 | 2. 67406900  | -1. 59557000 |
| C | -4. 97773500 | 1. 05191900  | 0. 69009900  |
| H | -3. 50850000 | -0. 46261600 | 1. 07975900  |
| C | -5. 27601600 | 2. 22786700  | 0. 00452400  |
| H | -4. 54124400 | 3. 71769200  | -1. 36510300 |
| H | -5. 72298300 | 0. 58791800  | 1. 32841400  |
| H | -6. 25421800 | 2. 68666500  | 0. 10969400  |
| C | -2. 13784100 | -2. 04951300 | -1. 00990400 |
| C | -1. 79468500 | -3. 33262100 | -0. 56723300 |
| C | -3. 36025000 | -1. 85815700 | -1. 66183100 |
| C | -2. 66836700 | -4. 39767600 | -0. 75564900 |
| H | -0. 83530500 | -3. 47637600 | -0. 07614600 |
| C | -4. 23474000 | -2. 92569700 | -1. 84398200 |
| H | -3. 62563200 | -0. 87009800 | -2. 02693000 |

|   |              |              |              |
|---|--------------|--------------|--------------|
| C | -3. 89297800 | -4. 19672100 | -1. 39004800 |
| H | -2. 39283500 | -5. 38776100 | -0. 40533000 |
| H | -5. 18354400 | -2. 76328400 | -2. 34634100 |
| H | -4. 57660000 | -5. 02792600 | -1. 53379900 |
| C | 3. 47275400  | -1. 76648600 | 1. 98768700  |
| C | 4. 75486700  | -2. 19650700 | 1. 26671100  |
| C | 4. 33492700  | -2. 24030900 | -0. 21419500 |
| H | 3. 39250200  | -0. 67271900 | 2. 04570300  |
| H | 3. 34471600  | -2. 17162100 | 2. 99280700  |
| H | 5. 59222000  | -1. 51675300 | 1. 43225500  |
| H | 5. 05146300  | -3. 19567800 | 1. 59838800  |
| H | 4. 49865600  | -1. 27772800 | -0. 70993500 |
| H | 4. 85275700  | -3. 01960500 | -0. 77819100 |
| C | 2. 37197700  | -2. 24388700 | 1. 05704500  |
| O | 1. 16275800  | -2. 34214500 | 1. 34277100  |
| N | 2. 90766200  | -2. 52876400 | -0. 12996600 |
| H | 2. 28418600  | -2. 60072300 | -0. 94280200 |

#### TS4

|    |              |              |              |
|----|--------------|--------------|--------------|
| C  | -0. 69449400 | -1. 10051800 | -0. 72973900 |
| C  | -1. 33934600 | 0. 15301100  | -0. 46697200 |
| C  | -0. 32960100 | 1. 19100600  | -0. 46386600 |
| C  | 0. 94181200  | 0. 58789000  | -0. 75666300 |
| C  | 0. 71542300  | -0. 83238800 | -1. 11615900 |
| C  | 0. 70185300  | 1. 19367100  | 2. 40002900  |
| O  | 1. 02775100  | 2. 07505700  | 3. 05180700  |
| O  | 1. 55471200  | -1. 65815900 | -1. 48051200 |
| C  | -1. 18046800 | -0. 79225200 | 2. 51678100  |
| O  | -1. 95705700 | -1. 14044200 | 3. 27938800  |
| Ru | 0. 07744800  | -0. 16668200 | 1. 19623100  |
| C  | 2. 22377100  | 1. 28669700  | -0. 98669800 |
| C  | 2. 64207800  | 2. 35982000  | -0. 18692400 |
| C  | 3. 05828300  | 0. 86758300  | -2. 03279000 |
| C  | 3. 85840800  | 2. 99041900  | -0. 42088900 |
| H  | 2. 00847000  | 2. 70342800  | 0. 62529600  |
| C  | 4. 27979800  | 1. 49761800  | -2. 25975000 |

|   |              |              |              |
|---|--------------|--------------|--------------|
| H | 2. 74871600  | 0. 03216200  | -2. 65076600 |
| C | 4. 68632600  | 2. 55861800  | -1. 45587200 |
| H | 4. 16220300  | 3. 81898600  | 0. 21141600  |
| H | 4. 91437900  | 1. 15641600  | -3. 07228600 |
| H | 5. 63982400  | 3. 04644500  | -1. 63269400 |
| C | -0. 60192700 | 2. 64770100  | -0. 37022800 |
| C | -0. 14874700 | 3. 48594000  | -1. 39436700 |
| C | -1. 34277900 | 3. 19637400  | 0. 68057500  |
| C | -0. 43091200 | 4. 84839800  | -1. 36593900 |
| H | 0. 42956400  | 3. 06328000  | -2. 21126800 |
| C | -1. 62529300 | 4. 55782700  | 0. 70633800  |
| H | -1. 70173100 | 2. 54446900  | 1. 47297200  |
| C | -1. 16914300 | 5. 38760400  | -0. 31581700 |
| H | -0. 07161900 | 5. 48845200  | -2. 16563400 |
| H | -2. 20093100 | 4. 97170200  | 1. 52834000  |
| H | -1. 38705500 | 6. 45076800  | -0. 29241100 |
| C | -2. 80282500 | 0. 39519700  | -0. 37472900 |
| C | -3. 38099300 | 1. 41400100  | -1. 13976800 |
| C | -3. 63595900 | -0. 42094900 | 0. 39892300  |
| C | -4. 75704900 | 1. 62480600  | -1. 11407100 |
| H | -2. 74981500 | 2. 04414100  | -1. 75871400 |
| C | -5. 00897300 | -0. 20869800 | 0. 42564200  |
| H | -3. 20787400 | -1. 24252000 | 0. 96392400  |
| C | -5. 57416300 | 0. 81869100  | -0. 32763400 |
| H | -5. 18827500 | 2. 42128100  | -1. 71238200 |
| H | -5. 63829200 | -0. 84965700 | 1. 03480700  |
| H | -6. 64656100 | 0. 98544700  | -0. 30482100 |
| C | -1. 32474400 | -2. 41102100 | -0. 99752800 |
| C | -0. 67223400 | -3. 58537300 | -0. 60536300 |
| C | -2. 52482300 | -2. 51810000 | -1. 71123500 |
| C | -1. 22408800 | -4. 83148700 | -0. 88127500 |
| H | 0. 28510400  | -3. 50884900 | -0. 10081700 |
| C | -3. 07739200 | -3. 76550000 | -1. 98453600 |
| H | -3. 02561800 | -1. 62052700 | -2. 05996100 |
| C | -2. 43436200 | -4. 92657200 | -1. 56413300 |
| H | -0. 70447200 | -5. 73096400 | -0. 56471300 |

|   |              |              |              |
|---|--------------|--------------|--------------|
| H | -4. 01138000 | -3. 82795600 | -2. 53476700 |
| H | -2. 86813300 | -5. 89912100 | -1. 77582400 |
| C | 3. 82665500  | -1. 27285300 | 0. 72183100  |
| C | 4. 33310800  | -2. 27093100 | -0. 35077300 |
| C | 3. 61465000  | -3. 62495600 | -0. 05265500 |
| H | 3. 56641900  | -0. 29379100 | 0. 31578300  |
| H | 4. 53216600  | -1. 12438000 | 1. 54723200  |
| H | 4. 01647200  | -1. 91144200 | -1. 33054700 |
| H | 5. 41990700  | -2. 37416700 | -0. 34120300 |
| H | 3. 16843100  | -4. 05220400 | -0. 95318600 |
| H | 4. 27711700  | -4. 36884900 | 0. 40149800  |
| C | 2. 64193400  | -2. 01651900 | 1. 23334000  |
| O | 1. 61589400  | -1. 74357800 | 2. 01192200  |
| N | 2. 56149200  | -3. 24892500 | 0. 88797400  |
| H | 1. 50169700  | -3. 01762000 | 1. 66737400  |

## 8

|    |              |              |              |
|----|--------------|--------------|--------------|
| C  | 1. 24666200  | -0. 97891100 | 0. 83840700  |
| C  | 1. 50871500  | 0. 36423900  | 0. 39743700  |
| C  | 0. 29260700  | 1. 14197000  | 0. 57552600  |
| C  | -0. 72668100 | 0. 28621300  | 1. 07823400  |
| C  | -0. 10111500 | -1. 02691000 | 1. 42139000  |
| C  | -0. 91209900 | 0. 66286200  | -2. 21074300 |
| O  | -1. 37501900 | 1. 42956400  | -2. 92393800 |
| O  | -0. 67787900 | -2. 03041800 | 1. 86686700  |
| C  | 1. 05209200  | -1. 26865700 | -2. 29829400 |
| O  | 1. 75917300  | -1. 74058700 | -3. 06211000 |
| Ru | -0. 03495300 | -0. 46808700 | -0. 93339100 |
| C  | -2. 14764800 | 0. 60294100  | 1. 33843500  |
| C  | -2. 85380000 | 1. 52334400  | 0. 54761600  |
| C  | -2. 82219000 | -0. 04000000 | 2. 38451400  |
| C  | -4. 18848100 | 1. 80871100  | 0. 80952800  |
| H  | -2. 35160100 | 2. 02582600  | -0. 27492000 |
| C  | -4. 15982800 | 0. 24903200  | 2. 64271500  |
| H  | -2. 29954700 | -0. 78232200 | 2. 97542800  |
| C  | -4. 84620000 | 1. 17623700  | 1. 86455000  |

|   |              |              |              |
|---|--------------|--------------|--------------|
| H | -4. 71497300 | 2. 52759100  | 0. 18906700  |
| H | -4. 66639000 | -0. 26046100 | 3. 45646100  |
| H | -5. 88850100 | 1. 40023400  | 2. 07107800  |
| C | 0. 19175300  | 2. 60405500  | 0. 34771500  |
| C | -0. 36003900 | 3. 40808600  | 1. 35009000  |
| C | 0. 68776900  | 3. 20383000  | -0. 81402000 |
| C | -0. 41856300 | 4. 78919500  | 1. 18978400  |
| H | -0. 74818400 | 2. 94413400  | 2. 25254000  |
| C | 0. 62538100  | 4. 58362600  | -0. 97282000 |
| H | 1. 12798500  | 2. 58127900  | -1. 58881900 |
| C | 0. 07162000  | 5. 37966300  | 0. 02785600  |
| H | -0. 85024400 | 5. 40314000  | 1. 97391500  |
| H | 1. 01011900  | 5. 03667100  | -1. 88091400 |
| H | 0. 02166200  | 6. 45657900  | -0. 09880000 |
| C | 2. 84239700  | 0. 93915500  | 0. 09079700  |
| C | 3. 27879400  | 2. 06045300  | 0. 80519400  |
| C | 3. 70969400  | 0. 34486800  | -0. 83077300 |
| C | 4. 55097100  | 2. 58304200  | 0. 59303300  |
| H | 2. 61620700  | 2. 52364600  | 1. 53055600  |
| C | 4. 98027100  | 0. 86886400  | -1. 04297900 |
| H | 3. 39468400  | -0. 54036800 | -1. 37360300 |
| C | 5. 40384800  | 1. 99089700  | -0. 33377000 |
| H | 4. 87293200  | 3. 45420800  | 1. 15476000  |
| H | 5. 64116600  | 0. 39717300  | -1. 76326800 |
| H | 6. 39531800  | 2. 39990200  | -0. 50121900 |
| C | 2. 20791600  | -2. 09519600 | 0. 97006400  |
| C | 1. 83982900  | -3. 38440100 | 0. 56987100  |
| C | 3. 47110500  | -1. 89873200 | 1. 53881100  |
| C | 2. 71957600  | -4. 45043400 | 0. 71974600  |
| H | 0. 85583500  | -3. 54530000 | 0. 13802200  |
| C | 4. 35279900  | -2. 96555900 | 1. 68319900  |
| H | 3. 76142600  | -0. 90554400 | 1. 86865300  |
| C | 3. 98132100  | -4. 24309200 | 1. 27279800  |
| H | 2. 41930700  | -5. 44418800 | 0. 40250900  |
| H | 5. 33124700  | -2. 79767000 | 2. 12267400  |
| H | 4. 67076400  | -5. 07391300 | 1. 38641100  |

|   |             |             |             |
|---|-------------|-------------|-------------|
| C | -3.54925400 | -1.26179100 | -1.88340100 |
| C | -5.03406000 | -1.61374200 | -1.71349200 |
| C | -5.11552100 | -2.00551000 | -0.21880800 |
| H | -3.36784800 | -0.19080300 | -1.72800800 |
| H | -3.11149000 | -1.54918700 | -2.84359900 |
| H | -5.70467500 | -0.79423000 | -1.97957200 |
| H | -5.28449300 | -2.47677800 | -2.33760100 |
| H | -5.39152800 | -1.15016400 | 0.40968500  |
| H | -5.83647800 | -2.80495600 | -0.02865300 |
| C | -2.97329000 | -2.02670600 | -0.71960000 |
| O | -1.62781200 | -2.22517400 | -0.63958800 |
| N | -3.76980600 | -2.43765600 | 0.17103400  |
| H | -1.44192000 | -2.51200100 | 0.29770400  |

**TS5**

|    |             |             |             |
|----|-------------|-------------|-------------|
| C  | 0.67536700  | 1.30043600  | -0.70807000 |
| C  | 2.01481600  | 0.85659700  | -0.47781400 |
| C  | 2.02994700  | -0.59049700 | -0.55625000 |
| C  | 0.70437000  | -1.04409200 | -0.88334400 |
| C  | -0.11620300 | 0.15310900  | -1.22328400 |
| C  | 1.25960100  | -1.48287900 | 2.25423600  |
| O  | 1.62791600  | -2.38683400 | 2.85097200  |
| O  | -1.25896400 | 0.19286800  | -1.66953000 |
| C  | 1.18617200  | 1.26653900  | 2.50577500  |
| O  | 1.49701300  | 2.03619600  | 3.29115300  |
| Ru | 0.76320500  | -0.00831400 | 1.12131700  |
| C  | 0.25925400  | -2.43883700 | -1.09131800 |
| C  | 0.87307000  | -3.52005600 | -0.43500200 |
| C  | -0.83293700 | -2.70792100 | -1.92956100 |
| C  | 0.41163100  | -4.81935200 | -0.61071700 |
| H  | 1.70983400  | -3.34395500 | 0.23370000  |
| C  | -1.29167700 | -4.01281100 | -2.10096600 |
| H  | -1.32413000 | -1.88303200 | -2.43130100 |
| C  | -0.67626400 | -5.07471300 | -1.44483600 |
| H  | 0.90303100  | -5.63467100 | -0.08861900 |
| H  | -2.13781200 | -4.19701600 | -2.75756600 |

|   |              |              |              |
|---|--------------|--------------|--------------|
| H | -1. 03735400 | -6. 08950700 | -1. 58064800 |
| C | 3. 26349300  | -1. 41503800 | -0. 50693700 |
| C | 3. 56985800  | -2. 23422800 | -1. 59880600 |
| C | 4. 15507400  | -1. 34810000 | 0. 56695900  |
| C | 4. 74766400  | -2. 97494500 | -1. 61377300 |
| H | 2. 87552300  | -2. 28963600 | -2. 43273400 |
| C | 5. 33248700  | -2. 08880100 | 0. 54966100  |
| H | 3. 92084600  | -0. 70542300 | 1. 41173700  |
| C | 5. 63118200  | -2. 90471800 | -0. 53927900 |
| H | 4. 97408700  | -3. 60849600 | -2. 46559400 |
| H | 6. 01662300  | -2. 02940500 | 1. 39020100  |
| H | 6. 54801500  | -3. 48560400 | -0. 54924300 |
| C | 3. 20768400  | 1. 73202700  | -0. 35709000 |
| C | 4. 34849400  | 1. 45657700  | -1. 11964900 |
| C | 3. 18635900  | 2. 88886600  | 0. 43123400  |
| C | 5. 45057700  | 2. 30530400  | -1. 07585400 |
| H | 4. 37207500  | 0. 57587600  | -1. 75351200 |
| C | 4. 28928100  | 3. 73340700  | 0. 47628900  |
| H | 2. 29461300  | 3. 13719600  | 0. 99780300  |
| C | 5. 42715800  | 3. 44217300  | -0. 27372700 |
| H | 6. 32755900  | 2. 07458000  | -1. 67234800 |
| H | 4. 25735900  | 4. 62352400  | 1. 09638500  |
| H | 6. 28825300  | 4. 10215200  | -0. 23738900 |
| C | 0. 21130400  | 2. 69776800  | -0. 85869800 |
| C | -0. 89756900 | 3. 15290600  | -0. 14176900 |
| C | 0. 84133100  | 3. 56862000  | -1. 75444900 |
| C | -1. 37072400 | 4. 45036600  | -0. 31359500 |
| H | -1. 39348000 | 2. 49132400  | 0. 56248300  |
| C | 0. 37463800  | 4. 86895100  | -1. 91949000 |
| H | 1. 70372300  | 3. 22349400  | -2. 31851200 |
| C | -0. 73357100 | 5. 31326700  | -1. 20103800 |
| H | -2. 23645500 | 4. 78053600  | 0. 25246400  |
| H | 0. 87603200  | 5. 53572800  | -2. 61449100 |
| H | -1. 09812300 | 6. 32732800  | -1. 33349100 |
| C | -1. 97182500 | -2. 57566600 | 1. 57395300  |
| C | -3. 20320700 | -3. 24499600 | 0. 92983600  |

|   |              |              |              |
|---|--------------|--------------|--------------|
| C | -3. 78765100 | -2. 15772000 | -0. 01027600 |
| H | -1. 03187000 | -2. 91597500 | 1. 12753600  |
| H | -1. 90071500 | -2. 71287300 | 2. 65685300  |
| H | -2. 93850500 | -4. 15323000 | 0. 38619400  |
| H | -3. 93594900 | -3. 50583000 | 1. 69790900  |
| H | -3. 53367500 | -2. 33625600 | -1. 06070300 |
| H | -4. 87558500 | -2. 06536300 | 0. 06375700  |
| C | -2. 21533700 | -1. 12957200 | 1. 23872300  |
| O | -1. 51300500 | -0. 14012600 | 1. 79388400  |
| N | -3. 16321900 | -0. 90918700 | 0. 41125400  |
| H | -2. 12958000 | 0. 73363700  | 1. 68209900  |
| C | -3. 62588600 | 1. 02188000  | 0. 25342300  |
| O | -3. 29221400 | 1. 47407400  | 1. 38955900  |
| H | -2. 93280600 | 1. 10718100  | -0. 59298400 |
| C | -5. 06486000 | 0. 90071200  | -0. 11091400 |
| C | -6. 05210100 | 1. 09021300  | 0. 85433400  |
| C | -5. 41321000 | 0. 57009700  | -1. 42067800 |
| C | -7. 39158200 | 0. 95067700  | 0. 50606300  |
| H | -5. 74785000 | 1. 35059900  | 1. 86324000  |
| C | -6. 75298600 | 0. 42769900  | -1. 76706000 |
| H | -4. 62601800 | 0. 42097000  | -2. 15719900 |
| C | -7. 74169700 | 0. 61836300  | -0. 80231300 |
| H | -8. 16531700 | 1. 10075700  | 1. 25264200  |
| H | -7. 02785900 | 0. 17252100  | -2. 78574700 |
| H | -8. 78808000 | 0. 50989400  | -1. 07150500 |

**9**

|   |              |              |              |
|---|--------------|--------------|--------------|
| C | -0. 16452400 | -1. 03520600 | -0. 61884300 |
| C | -1. 58126600 | -1. 16289900 | -0. 54723000 |
| C | -2. 14749400 | 0. 17507700  | -0. 54884500 |
| C | -1. 07344400 | 1. 12591800  | -0. 74178400 |
| C | 0. 16601100  | 0. 37272400  | -0. 98994300 |
| C | -1. 84828900 | 1. 26171000  | 2. 33523100  |
| O | -2. 45439400 | 2. 03217400  | 2. 92469000  |
| O | 1. 29148900  | 0. 80721500  | -1. 25852900 |
| C | -1. 22380400 | -1. 38664100 | 2. 52169000  |

|    |             |             |             |
|----|-------------|-------------|-------------|
| O  | -1.45675200 | -2.23436500 | 3.25482000  |
| Ru | -0.92105200 | -0.00186900 | 1.23153800  |
| C  | -1.20308400 | 2.58725000  | -0.93012000 |
| C  | -2.19047500 | 3.33596600  | -0.27101100 |
| C  | -0.31088100 | 3.26312300  | -1.77628400 |
| C  | -2.28297300 | 4.71050700  | -0.45139500 |
| H  | -2.89532200 | 2.83807300  | 0.38758800  |
| C  | -0.40436800 | 4.64229000  | -1.94905100 |
| H  | 0.46583600  | 2.69983900  | -2.28004200 |
| C  | -1.38783900 | 5.37291900  | -1.28953800 |
| H  | -3.05621000 | 5.26590400  | 0.07050900  |
| H  | 0.29710100  | 5.14526300  | -2.60835600 |
| H  | -1.45796900 | 6.44769700  | -1.42551900 |
| C  | -3.60186200 | 0.46339200  | -0.62489500 |
| C  | -4.10233000 | 1.18041800  | -1.71662600 |
| C  | -4.49209300 | -0.01821900 | 0.33901000  |
| C  | -5.46936500 | 1.41001000  | -1.84046800 |
| H  | -3.41219400 | 1.56064000  | -2.46470100 |
| C  | -5.85846100 | 0.20862900  | 0.21171600  |
| H  | -4.10185100 | -0.57792000 | 1.18529700  |
| C  | -6.35065300 | 0.92419500  | -0.87738200 |
| H  | -5.84494700 | 1.97055700  | -2.69092700 |
| H  | -6.53952900 | -0.17260000 | 0.96602000  |
| H  | -7.41666700 | 1.10486100  | -0.97405800 |
| C  | -2.35691200 | -2.42581500 | -0.61173600 |
| C  | -3.40881200 | -2.52989000 | -1.53048100 |
| C  | -2.02359700 | -3.54510800 | 0.15786300  |
| C  | -4.11646400 | -3.71962000 | -1.66427100 |
| H  | -3.67158600 | -1.67403300 | -2.14415300 |
| C  | -2.73414400 | -4.73307200 | 0.02514600  |
| H  | -1.20647600 | -3.48865900 | 0.86722000  |
| C  | -3.78474100 | -4.82376800 | -0.88374800 |
| H  | -4.92905700 | -3.78210000 | -2.38116800 |
| H  | -2.46428700 | -5.58892300 | 0.63557300  |
| H  | -4.33977600 | -5.75124100 | -0.98458300 |
| C  | 0.89532300  | -2.06541600 | -0.67933000 |

|   |             |              |              |
|---|-------------|--------------|--------------|
| C | 1. 32950800 | -2. 77132500 | 0. 44786300  |
| C | 1. 60172900 | -2. 21886200 | -1. 87825600 |
| C | 2. 43334400 | -3. 61590200 | 0. 37919800  |
| H | 0. 83142700 | -2. 61191600 | 1. 40061000  |
| C | 2. 70854800 | -3. 05879000 | -1. 94730500 |
| H | 1. 29405600 | -1. 64624200 | -2. 74802100 |
| C | 3. 12970300 | -3. 75682800 | -0. 81780500 |
| H | 2. 76782600 | -4. 13843300 | 1. 26981100  |
| H | 3. 25554600 | -3. 15265000 | -2. 88039800 |
| H | 4. 00616000 | -4. 39493100 | -0. 86564200 |
| C | 1. 45286400 | 2. 72736700  | 1. 46275900  |
| C | 2. 75230100 | 3. 46887400  | 1. 12736900  |
| C | 3. 58622400 | 2. 40859700  | 0. 39181200  |
| H | 0. 72628600 | 2. 81379800  | 0. 64670000  |
| H | 0. 96718900 | 3. 03663500  | 2. 39160100  |
| H | 2. 58554500 | 4. 35582600  | 0. 51379500  |
| H | 3. 26502500 | 3. 77115800  | 2. 04508700  |
| H | 3. 36661400 | 2. 39412900  | -0. 68204400 |
| H | 4. 66258800 | 2. 52025600  | 0. 53595600  |
| C | 1. 89366400 | 1. 28547500  | 1. 52298900  |
| O | 1. 24070900 | 0. 31285000  | 1. 96700200  |
| N | 3. 11055700 | 1. 16082200  | 0. 99330200  |
| H | 2. 93504000 | -1. 02717300 | 2. 25861800  |
| C | 3. 59663800 | -0. 20354200 | 0. 68075700  |
| O | 3. 81652100 | -0. 90681900 | 1. 86591200  |
| H | 2. 80053400 | -0. 66683800 | 0. 08884600  |
| C | 4. 85229100 | -0. 14625400 | -0. 14710000 |
| C | 6. 11018000 | -0. 25729700 | 0. 44063200  |
| C | 4. 73548300 | 0. 04329500  | -1. 52493700 |
| C | 7. 25275200 | -0. 17493300 | -0. 35188700 |
| H | 6. 18051700 | -0. 42218100 | 1. 51090800  |
| C | 5. 87945400 | 0. 13061900  | -2. 31273200 |
| H | 3. 74148900 | 0. 12275600  | -1. 96212900 |
| C | 7. 13921400 | 0. 02177400  | -1. 72637800 |
| H | 8. 23393400 | -0. 26791800 | 0. 10383000  |
| H | 5. 78871800 | 0. 27674500  | -3. 38484200 |

|   |            |            |             |
|---|------------|------------|-------------|
| H | 8.03209000 | 0.08321400 | -2.34125800 |
|---|------------|------------|-------------|

**TS6**

|   |             |             |             |
|---|-------------|-------------|-------------|
| C | -3.16695200 | -1.05473700 | -0.09394300 |
| C | -3.82768800 | 0.27796900  | 0.27270900  |
| C | -2.74502000 | 1.31286900  | -0.09951100 |
| H | -3.39932700 | -1.37486400 | -1.11669600 |
| H | -3.40034700 | -1.88566700 | 0.57465500  |
| H | -4.77495900 | 0.45433600  | -0.24058300 |
| H | -4.01418000 | 0.31403700  | 1.35009700  |
| H | -2.88846600 | 1.69868900  | -1.11730800 |
| H | -2.73166700 | 2.17147100  | 0.57755900  |
| C | -1.69683900 | -0.69972500 | -0.03149700 |
| O | -0.79953700 | -1.61892900 | -0.01723600 |
| N | -1.48068100 | 0.58319500  | -0.02228600 |
| H | -0.24582700 | 1.16493900  | -0.02045300 |
| C | 3.16695200  | 1.05473700  | -0.09393700 |
| C | 3.82768700  | -0.27797000 | 0.27271300  |
| C | 2.74502100  | -1.31286900 | -0.09951000 |
| H | 3.39932900  | 1.37486600  | -1.11668800 |
| H | 3.40034600  | 1.88566500  | 0.57466300  |
| H | 4.77496000  | -0.45433500 | -0.24057800 |
| H | 4.01417800  | -0.31404000 | 1.35010200  |
| H | 2.88846700  | -1.69868600 | -1.11730900 |
| H | 2.73166700  | -2.17147300 | 0.57755700  |
| C | 1.69683900  | 0.69972500  | -0.03149300 |
| O | 0.79953800  | 1.61892900  | -0.01723100 |
| N | 1.48068100  | -0.58319500 | -0.02228600 |
| H | 0.24582700  | -1.16493900 | -0.02045600 |

**10**

|   |            |             |             |
|---|------------|-------------|-------------|
| C | 3.49940800 | 0.59239600  | -0.13757400 |
| C | 3.78659800 | -0.86613800 | 0.23378300  |
| C | 2.44137800 | -1.56396800 | -0.07245400 |
| H | 3.79467600 | 0.83724900  | -1.16482200 |
| H | 3.95422500 | 1.33375100  | 0.52310400  |

|   |              |              |              |
|---|--------------|--------------|--------------|
| H | 4. 62621700  | -1. 30154400 | -0. 31200300 |
| H | 4. 00504200  | -0. 94001300 | 1. 30333000  |
| H | 2. 43838500  | -2. 00772700 | -1. 07708100 |
| H | 2. 21693000  | -2. 36734200 | 0. 63576500  |
| C | 1. 99126900  | 0. 61971600  | -0. 04734800 |
| O | 1. 39679800  | 1. 79405300  | -0. 04867900 |
| N | 1. 41237200  | -0. 52287500 | -0. 00282600 |
| C | -3. 46517800 | 0. 65758200  | 0. 18029200  |
| C | -3. 81163300 | -0. 77706200 | -0. 23268400 |
| C | -2. 52465600 | -1. 56489800 | 0. 08341100  |
| H | -3. 70995200 | 0. 85771100  | 1. 22991500  |
| H | -3. 93309400 | 1. 43515900  | -0. 42537000 |
| H | -4. 68330400 | -1. 18375200 | 0. 28315200  |
| H | -4. 00397300 | -0. 81577400 | -1. 30876200 |
| H | -2. 54518400 | -1. 97993300 | 1. 09988800  |
| H | -2. 35502400 | -2. 38768200 | -0. 61601400 |
| C | -1. 94974200 | 0. 70784600  | 0. 04317300  |
| O | -1. 26887700 | 1. 73443900  | 0. 03662900  |
| N | -1. 49228100 | -0. 55136500 | -0. 04342300 |
| H | 0. 39980400  | 1. 70269800  | -0. 02231900 |
| H | -0. 47341600 | -0. 72389800 | -0. 03223500 |

## 10'

|   |              |              |              |
|---|--------------|--------------|--------------|
| C | 0. 79669500  | 2. 17469300  | -0. 05532300 |
| O | 0. 15004500  | 2. 66320800  | -0. 95689800 |
| H | 1. 01130800  | 2. 74256200  | 0. 86807300  |
| C | 1. 35275800  | 0. 79730500  | -0. 10589300 |
| C | 1. 22202700  | 0. 04043200  | -1. 27128200 |
| C | 1. 95315900  | 0. 24800700  | 1. 02606300  |
| C | 1. 69618500  | -1. 26584000 | -1. 30491200 |
| H | 0. 74555600  | 0. 49659200  | -2. 13481600 |
| C | 2. 43071900  | -1. 05892100 | 0. 99257900  |
| H | 2. 01603100  | 0. 83970000  | 1. 93586600  |
| C | 2. 30210000  | -1. 81361500 | -0. 17265500 |
| H | 1. 60188900  | -1. 85768400 | -2. 21054700 |
| H | 2. 89526600  | -1. 49170600 | 1. 87293000  |
| H | 2. 67450700  | -2. 83340100 | -0. 19944000 |
| C | -1. 53892600 | -1. 21665100 | 1. 05287800  |

|   |             |             |             |
|---|-------------|-------------|-------------|
| C | -2.43512700 | -1.69787800 | -0.09092300 |
| C | -2.23552800 | -0.62282000 | -1.17581000 |
| H | -0.50747300 | -1.57834700 | 0.94236300  |
| H | -1.88518900 | -1.47884300 | 2.05370300  |
| H | -2.18519200 | -2.69671600 | -0.45353900 |
| H | -3.48113800 | -1.70117600 | 0.22946400  |
| H | -1.38872400 | -0.87625300 | -1.82860300 |
| H | -3.12359500 | -0.48323700 | -1.79796200 |
| C | -1.48684100 | 0.29503200  | 0.86828000  |
| O | -1.05941300 | 1.11552300  | 1.66151700  |
| N | -1.95387100 | 0.56285300  | -0.38518800 |
| H | -1.76451300 | 1.47022100  | -0.79615000 |

### TS7

|   |             |             |             |
|---|-------------|-------------|-------------|
| C | 1.39884500  | -1.24723000 | 0.15212800  |
| O | 1.09205600  | -1.98780300 | -0.81695100 |
| H | 0.82365300  | -1.29875900 | 1.09311400  |
| C | 2.82253200  | -0.81586600 | 0.34543800  |
| C | 3.73738000  | -0.99805900 | -0.68950600 |
| C | 3.22814300  | -0.22661000 | 1.54133500  |
| C | 5.05564800  | -0.58544400 | -0.52836200 |
| H | 3.39106900  | -1.47172100 | -1.60303700 |
| C | 4.54692800  | 0.18819700  | 1.70309700  |
| H | 2.50558400  | -0.09465800 | 2.34463900  |
| C | 5.46042600  | 0.00959000  | 0.66627500  |
| H | 5.77242600  | -0.72826100 | -1.33151400 |
| H | 4.86413400  | 0.64510900  | 2.63568200  |
| H | 6.49038200  | 0.33052600  | 0.79092500  |
| C | -0.75674700 | 1.84296100  | -1.60740000 |
| C | -0.11451800 | 2.73566500  | -0.53392700 |
| C | 1.00886700  | 1.85296100  | 0.06182800  |
| H | -0.36413600 | 2.02068200  | -2.61584800 |
| H | -1.84585800 | 1.90683600  | -1.63600800 |
| H | 0.26566700  | 3.67920900  | -0.92962700 |
| H | -0.85814200 | 2.94374800  | 0.23699000  |
| H | 1.99404000  | 2.05692200  | -0.37602300 |
| H | 1.09970900  | 1.96435600  | 1.14605600  |
| C | -0.30965100 | 0.48251800  | -1.15300100 |

|   |             |             |             |
|---|-------------|-------------|-------------|
| O | -0.82067600 | -0.61846600 | -1.67422400 |
| N | 0.61701500  | 0.48488600  | -0.26673300 |
| H | -0.20055100 | -1.38434200 | -1.37888500 |
| C | -4.58090800 | 0.12996300  | 1.55124100  |
| C | -5.54258300 | -0.76191400 | 0.76024600  |
| C | -4.61075300 | -1.55190700 | -0.17788200 |
| H | -4.21242100 | -0.36519400 | 2.45745100  |
| H | -4.98925800 | 1.09859400  | 1.84363400  |
| H | -6.15087500 | -1.41694900 | 1.38638600  |
| H | -6.21505900 | -0.14146000 | 0.16070200  |
| H | -4.26861300 | -2.48562000 | 0.28882400  |
| H | -5.08861200 | -1.80129100 | -1.12890800 |
| C | -3.39140800 | 0.30833800  | 0.61110700  |
| O | -2.49016300 | 1.12276700  | 0.72384900  |
| N | -3.50949600 | -0.62467600 | -0.37058100 |
| H | -2.72873100 | -0.79016800 | -1.00043800 |

### TS8

|   |             |             |             |
|---|-------------|-------------|-------------|
| C | -0.80269100 | -0.78269900 | 0.05495300  |
| O | -0.24259500 | -1.29185600 | 1.05197700  |
| H | -0.23458700 | -0.66212100 | -0.88494600 |
| C | -2.28570700 | -0.84097600 | -0.10986700 |
| C | -3.08455700 | -1.26619400 | 0.94958900  |
| C | -2.86721800 | -0.49415300 | -1.32825200 |
| C | -4.46463300 | -1.32988400 | 0.79398100  |
| H | -2.60352700 | -1.54687300 | 1.88147100  |
| C | -4.24832200 | -0.55806000 | -1.48501200 |
| H | -2.23243100 | -0.17582900 | -2.15318500 |
| C | -5.04725000 | -0.97424600 | -0.42191600 |
| H | -5.08932400 | -1.65938200 | 1.61873300  |
| H | -4.70170200 | -0.28910200 | -2.43424700 |
| H | -6.12514300 | -1.02675200 | -0.54298700 |
| C | 0.94660500  | 2.94779200  | 0.75212700  |
| C | 0.02641800  | 3.45575200  | -0.36810000 |
| C | -0.67537600 | 2.16887400  | -0.86049600 |
| H | 1.01988900  | 3.60614700  | 1.62092000  |

|   |              |              |              |
|---|--------------|--------------|--------------|
| H | 1. 95508000  | 2. 71968000  | 0. 39251300  |
| H | -0. 71466600 | 4. 14908500  | 0. 03990200  |
| H | 0. 56736600  | 3. 96501100  | -1. 16721000 |
| H | -1. 71419000 | 2. 33477900  | -1. 16103800 |
| H | -0. 13094200 | 1. 71579200  | -1. 69866600 |
| C | 0. 28888200  | 1. 63932300  | 1. 08717700  |
| O | 0. 68280900  | 0. 95506400  | 2. 14619000  |
| N | -0. 61718500 | 1. 24664800  | 0. 27066000  |
| H | 0. 29610500  | 0. 04912600  | 2. 07115900  |
| C | 4. 22138800  | -0. 51433200 | -1. 16899300 |
| C | 4. 77539100  | -1. 55790900 | -0. 19447700 |
| C | 3. 51715000  | -2. 31011600 | 0. 28075900  |
| H | 4. 16478900  | -0. 89704500 | -2. 19486200 |
| H | 4. 77359100  | 0. 42640900  | -1. 19433800 |
| H | 5. 51418700  | -2. 22724600 | -0. 63924200 |
| H | 5. 24048000  | -1. 05667300 | 0. 65938300  |
| H | 3. 30893000  | -3. 18480700 | -0. 35028400 |
| H | 3. 59979000  | -2. 65279600 | 1. 31556200  |
| C | 2. 79201300  | -0. 28499900 | -0. 68063800 |
| O | 2. 06077200  | 0. 64342900  | -1. 00232500 |
| N | 2. 47579800  | -1. 30806800 | 0. 14422000  |
| H | 1. 53556200  | -1. 39959200 | 0. 54545700  |

## TS9

|   |              |              |              |
|---|--------------|--------------|--------------|
| C | -0. 59253300 | -0. 74058500 | 0. 40549800  |
| O | -0. 52534600 | -1. 69885900 | -0. 41333000 |
| H | -0. 66350900 | -0. 93728200 | 1. 48416700  |
| C | 0. 06439300  | 0. 56699500  | 0. 07190200  |
| C | 0. 37062500  | 0. 86105200  | -1. 25548000 |
| C | 0. 37929700  | 1. 47678000  | 1. 07947100  |
| C | 0. 98821900  | 2. 06636000  | -1. 57661800 |
| H | 0. 12606000  | 0. 12454500  | -2. 01623600 |
| C | 0. 99263600  | 2. 68562500  | 0. 75898800  |
| H | 0. 17047700  | 1. 21842200  | 2. 11476000  |
| C | 1. 29727200  | 2. 98059500  | -0. 56925500 |
| H | 1. 22893900  | 2. 29594400  | -2. 61067400 |

|   |              |              |              |
|---|--------------|--------------|--------------|
| H | 1. 24379300  | 3. 39172400  | 1. 54484500  |
| H | 1. 77999800  | 3. 92094100  | -0. 81862800 |
| C | -4. 71927700 | -0. 50657000 | -0. 21915800 |
| C | -4. 50462400 | 1. 00675900  | -0. 05014100 |
| C | -3. 11396500 | 1. 10750300  | 0. 62366400  |
| H | -5. 19602400 | -0. 79853500 | -1. 15724800 |
| H | -5. 29559600 | -0. 95091300 | 0. 60052500  |
| H | -4. 47107700 | 1. 48687500  | -1. 03186300 |
| H | -5. 28884900 | 1. 48994900  | 0. 53489900  |
| H | -2. 51293900 | 1. 93967000  | 0. 24525800  |
| H | -3. 18954500 | 1. 21987000  | 1. 71227900  |
| C | -3. 30252600 | -1. 01329800 | -0. 14040500 |
| O | -3. 01166300 | -2. 24281500 | -0. 48702900 |
| N | -2. 45716300 | -0. 15848000 | 0. 31423100  |
| H | -2. 00175400 | -2. 32416600 | -0. 44852400 |
| C | 3. 78154400  | -0. 07191600 | 0. 77209800  |
| C | 4. 44899700  | -0. 56742900 | -0. 51224400 |
| C | 3. 27672900  | -1. 18389000 | -1. 29549600 |
| H | 3. 36196800  | 0. 93550200  | 0. 64617600  |
| H | 4. 41876800  | -0. 06828400 | 1. 65774400  |
| H | 4. 95493800  | 0. 21813000  | -1. 07696200 |
| H | 5. 17965600  | -1. 34757400 | -0. 27790700 |
| H | 2. 76584800  | -0. 42110100 | -1. 90052400 |
| H | 3. 59127600  | -1. 99762800 | -1. 95461100 |
| C | 2. 59115200  | -1. 00914100 | 0. 94960200  |
| O | 1. 89167500  | -1. 11694900 | 1. 94185100  |
| N | 2. 41558200  | -1. 66964600 | -0. 23138300 |
| H | 1. 50367500  | -2. 08326600 | -0. 41390400 |

## 11

|   |              |              |              |
|---|--------------|--------------|--------------|
| C | -4. 50570400 | -1. 31728500 | -0. 69863200 |
| C | -4. 91759900 | -1. 43328500 | 0. 77222200  |
| C | -4. 16440800 | -0. 27179700 | 1. 44810400  |
| H | -5. 17791700 | -0. 66385100 | -1. 26704000 |
| H | -4. 43464700 | -2. 26670700 | -1. 23154500 |
| H | -5. 99572700 | -1. 37570300 | 0. 93212600  |

|   |             |             |             |
|---|-------------|-------------|-------------|
| H | -4.56205100 | -2.38285400 | 1.18246400  |
| H | -4.76532500 | 0.64690900  | 1.45882000  |
| H | -3.87343500 | -0.49974000 | 2.47640000  |
| C | -3.14409400 | -0.63529300 | -0.63731300 |
| O | -2.34401100 | -0.56268600 | -1.56453700 |
| N | -2.99552900 | -0.11647400 | 0.59799000  |
| H | -2.22194000 | 0.51760700  | 0.81605400  |
| C | 0.53039900  | 3.53452800  | 0.18556300  |
| C | 1.94343700  | 3.37868800  | -0.38555500 |
| C | 1.92243400  | 1.97668700  | -1.01337600 |
| H | -0.16452500 | 3.96212000  | -0.54682800 |
| H | 0.46326600  | 4.13158100  | 1.09656000  |
| H | 2.20824900  | 4.15223300  | -1.10855000 |
| H | 2.67752900  | 3.40400000  | 0.42542500  |
| H | 1.59472000  | 1.98701400  | -2.05934000 |
| H | 2.88807900  | 1.46612900  | -0.96031600 |
| C | 0.08147800  | 2.10362100  | 0.44647400  |
| O | -0.89282800 | 1.76950000  | 1.11164300  |
| N | 0.93993900  | 1.27410500  | -0.19578900 |
| H | -0.60832200 | -0.37855600 | -1.76329200 |
| C | 0.71098200  | -0.15559900 | -0.37910500 |
| O | 0.36899500  | -0.43399600 | -1.69697500 |
| H | -0.10734000 | -0.40580100 | 0.31030100  |
| C | 1.95884200  | -0.93402800 | 0.00670800  |
| C | 2.39954600  | -1.99063900 | -0.78627000 |
| C | 2.65525600  | -0.61442500 | 1.17437100  |
| C | 3.52678200  | -2.72108100 | -0.41530900 |
| H | 1.85296800  | -2.22589500 | -1.69208500 |
| C | 3.77922700  | -1.34542800 | 1.54506200  |
| H | 2.31353000  | 0.21437400  | 1.79026400  |
| C | 4.21824000  | -2.40210500 | 0.74920700  |
| H | 3.86509500  | -3.54204600 | -1.04056100 |
| H | 4.31437000  | -1.08985900 | 2.45479300  |
| H | 5.09639500  | -2.97227600 | 1.03697400  |

**H2**

|   |            |            |             |
|---|------------|------------|-------------|
| H | 0.00000000 | 0.00000000 | 0.36827100  |
| H | 0.00000000 | 0.00000000 | -0.36827100 |
